# Supplementary material for: A simple, efficient Pd-catalyzed synthesis of N-sulfonylimines from organoboronic acids and tosylbenzimidoyl chlorides
Source: Royal Society of Chemistry journal article supplement (doi:10.1039/b802867b), 2008-01-01
Supplement: b802867b.pdf [file b802867b.pdf]

## Supplementary Information for OBC paper b802867b

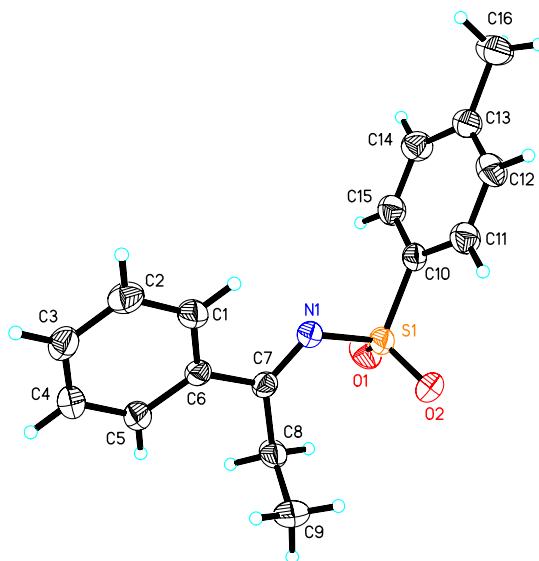

Molecular structure of **3o**

Table 1. Crystal data and structure refinement for complex **3o**

|                                   |                                                    |                       |
|-----------------------------------|----------------------------------------------------|-----------------------|
| Identification code               | complex 3q                                         |                       |
| Empirical formula                 | C <sub>16</sub> H <sub>17</sub> N O <sub>2</sub> S |                       |
| Formula weight                    | 287.37                                             |                       |
| Temperature                       | 293(2) K                                           |                       |
| Wavelength                        | 0.71073 Å                                          |                       |
| Crystal system, space group       | Monoclinic, P2(1)/c                                |                       |
| Unit cell dimensions              | a = 8.6787(9) Å                                    | alpha = 90 deg.       |
|                                   | b = 13.9781(15) Å                                  | beta = 99.664(2) deg. |
|                                   | c = 12.3242(13) Å                                  | gamma = 90 deg.       |
| Volume                            | 1473.9(3) Å <sup>3</sup>                           |                       |
| Z, Calculated density             | 4, 1.295 Mg/m <sup>3</sup>                         |                       |
| Absorption coefficient            | 0.220 mm <sup>-1</sup>                             |                       |
| F(000)                            | 608                                                |                       |
| Crystal size                      | 0.496 x 0.415 x 0.347 mm                           |                       |
| Theta range for data collection   | 4.761 to 53.719 deg.                               |                       |
| Limiting indices                  | -11 ≤ h ≤ 11, -17 ≤ k ≤ 17, -15 ≤ l ≤ 7            |                       |
| Reflections collected / unique    | 8462 / 3342 [R(int) = 0.0658]                      |                       |
| Absorption correction             | empirical                                          |                       |
| Max. and min. transmission        | 1.0000 and 0.73594                                 |                       |
| Refinement method                 | Full-matrix least-squares on F <sup>2</sup>        |                       |
| Data / restraints / parameters    | 3199 / 0 / 183                                     |                       |
| Goodness-of-fit on F <sup>2</sup> | 0.970                                              |                       |
| Final R indices [I > 2σ(I)]       | R1 = 0.0498, wR2 = 0.1359                          |                       |
| R indices (all data)              | R1 = 0.0617, wR2 = 0.1425                          |                       |

Table 2. Atomic coordinates and equivalent isotropic displacement parameters for complex **3o**.

|        | x           | y            | z           | U(eq)       |
|--------|-------------|--------------|-------------|-------------|
| S(1)   | 0.70189(5)  | 0.12908(3)   | 0.68264(4)  | 0.05215(19) |
| O(1)   | 0.82545(17) | 0.17497(10)  | 0.75579(12) | 0.0721(4)   |
| O(2)   | 0.61536(19) | 0.18363(10)  | 0.59503(11) | 0.0727(4)   |
| N(1)   | 0.57779(16) | 0.07667(10)  | 0.75177(11) | 0.0473(3)   |
| C(1)   | 0.3540(2)   | -0.02522(13) | 0.83880(15) | 0.0538(4)   |
| H(1)   | 0.3919      | -0.0510      | 0.7789      | 0.065       |
| C(2)   | 0.2599(2)   | -0.07962(14) | 0.89330(17) | 0.0618(5)   |
| H(2)   | 0.2356      | -0.1421      | 0.8708      | 0.074       |
| C(3)   | 0.2011(2)   | -0.04192(15) | 0.98151(16) | 0.0591(5)   |
| H(3)   | 0.1370      | -0.0788      | 1.0183      | 0.071       |
| C(4)   | 0.2375(2)   | 0.04955(15)  | 1.01427(16) | 0.0638(5)   |
| H(4)   | 0.1976      | 0.0752       | 1.0734      | 0.077       |
| C(5)   | 0.3330(2)   | 0.10438(13)  | 0.96039(15) | 0.0561(5)   |
| H(5)   | 0.3571      | 0.1667       | 0.9838      | 0.067       |
| C(6)   | 0.39360(18) | 0.06783(11)  | 0.87175(12) | 0.0429(4)   |
| C(7)   | 0.50276(19) | 0.12406(11)  | 0.81540(12) | 0.0434(4)   |
| C(8)   | 0.5115(2)   | 0.23092(12)  | 0.83421(15) | 0.0577(5)   |
| H(8A)  | 0.5202      | 0.2440       | 0.9123      | 0.069       |
| H(8B)  | 0.6043      | 0.2559       | 0.8099      | 0.069       |
| C(9)   | 0.3699(3)   | 0.28060(16)  | 0.7732(2)   | 0.0863(7)   |
| H(9A)  | 0.3670      | 0.2733       | 0.6954      | 0.129       |
| H(9B)  | 0.3744      | 0.3474       | 0.7917      | 0.129       |
| H(9C)  | 0.2775      | 0.2529       | 0.7934      | 0.129       |
| C(10)  | 0.7818(2)   | 0.02936(13)  | 0.62584(14) | 0.0479(4)   |
| C(11)  | 0.7207(2)   | -0.00175(15) | 0.52205(15) | 0.0609(5)   |
| H(11)  | 0.6355      | 0.0294       | 0.4812      | 0.073       |
| C(12)  | 0.7864(2)   | -0.07952(16) | 0.47872(17) | 0.0663(5)   |
| H(12)  | 0.7442      | -0.1003      | 0.4083      | 0.080       |
| C(13)  | 0.9122(2)   | -0.12721(13) | 0.53634(17) | 0.0568(5)   |
| C(14)  | 0.9711(2)   | -0.09485(15) | 0.64091(18) | 0.0643(5)   |
| H(14)  | 1.0555      | -0.1266      | 0.6820      | 0.077       |
| C(15)  | 0.9086(2)   | -0.01733(15) | 0.68565(15) | 0.0601(5)   |
| H(15)  | 0.9512      | 0.0038       | 0.7559      | 0.072       |
| C(16)  | 0.9841(3)   | -0.21283(16) | 0.4900(2)   | 0.0794(7)   |
| H(16A) | 0.9543      | -0.2699      | 0.5244      | 0.119       |
| H(16B) | 1.0959      | -0.2068      | 0.5039      | 0.119       |
| H(16C) | 0.9480      | -0.2163      | 0.4121      | 0.119       |

Table 3. Anisotropic displacement parameters ( $\text{\AA}^2 \times 10^3$ ) for complex **3o**.

|       | U11        | U22        | U33        | U23         | U13        | U12          |
|-------|------------|------------|------------|-------------|------------|--------------|
| S(1)  | 0.0673(3)  | 0.0436(3)  | 0.0493(3)  | 0.00107(18) | 0.0209(2)  | -0.00358(19) |
| O(1)  | 0.0735(9)  | 0.0702(9)  | 0.0769(9)  | -0.0212(7)  | 0.0253(7)  | -0.0205(7)   |
| O (2) | 0.1041(11) | 0.0571(8)  | 0.0621(9)  | 0.0195(6)   | 0.0288(8)  | 0.0168(7)    |
| N(1)  | 0.0572(8)  | 0.0422(7)  | 0.0447(8)  | 0.0019(6)   | 0.0147(6)  | 0.0009(6)    |
| C(1)  | 0.0607(10) | 0.0460(9)  | 0.0564(11) | -0.0042(8)  | 0.0148(8)  | -0.0010(8)   |
| C(2)  | 0.0620(11) | 0.0459(10) | 0.0768(14) | 0.0016(9)   | 0.0094(10) | -0.0075(8)   |
| C(3)  | 0.0530(10) | 0.0609(11) | 0.0644(12) | 0.0159(9)   | 0.0131(9)  | -0.0017(9)   |
| C(4)  | 0.0757(12) | 0.0643(12) | 0.0572(12) | 0.0034(9)   | 0.0278(10) | 0.0038(10)   |
| C(5)  | 0.0712(12) | 0.0483(9)  | 0.0522(11) | -0.0009(8)  | 0.0199(9)  | 0.0006(9)    |
| C(6)  | 0.0471(8)  | 0.0418(8)  | 0.0386(8)  | 0.0032(7)   | 0.0039(7)  | 0.0054(7)    |
| C(7)  | 0.0516(9)  | 0.0405(9)  | 0.0367(9)  | 0.0022(6)   | 0.0038(7)  | 0.0018(7)    |
| C(8)  | 0.0784(12) | 0.0412(9)  | 0.0588(11) | -0.0094(8)  | 0.0274(9)  | -0.0081(9)   |
| C(9)  | 0.1159(19) | 0.0514(11) | 0.0988(17) | 0.0104(12)  | 0.0388(15) | 0.0249(13)   |
| C(10) | 0.0545(9)  | 0.0485(9)  | 0.0438(9)  | 0.0023(7)   | 0.0172(7)  | -0.0027(8)   |
| C(11) | 0.0641(11) | 0.0665(12) | 0.0506(11) | -0.0028(9)  | 0.0052(9)  | 0.0064(9)    |
| C(12) | 0.0763(12) | 0.0696(13) | 0.0528(11) | -0.0150(10) | 0.0100(10) | -0.0030(11)  |
| C(13) | 0.0579(10) | 0.0488(10) | 0.0694(13) | -0.0017(8)  | 0.0266(10) | -0.0069(8)   |
| C(14) | 0.0592(11) | 0.0654(12) | 0.0671(13) | 0.0004(10)  | 0.0077(9)  | 0.0067(10)   |
| C(15) | 0.0648(11) | 0.0660(12) | 0.0478(10) | -0.0018(9)  | 0.0050(9)  | 0.0035(9)    |
| C(16) | 0.0827(14) | 0.0583(12) | 0.1058(18) | -0.0139(12) | 0.0403(13) | -0.0033(11)  |

Table 4. Bond lengths [Å] and angles [deg] for complex **3o**.

---

|                 |            |
|-----------------|------------|
| S(1)-O(2)       | 1.4280(14) |
| S(1)-O(1)       | 1.4316(15) |
| S(1)-N (1)      | 1.6525(13) |
| S(1)-C(10)      | 1.7543(18) |
| N(1)-C(7)       | 1.284(2)   |
| C(1)-C(2)       | 1.371(2)   |
| C(1)-C(6)       | 1.388(2)   |
| C(1)-H(1)       | 0.9300     |
| C(2)-C(3)       | 1.381(3)   |
| C(2)-H(2)       | 0.9300     |
| C(3)-C(4)       | 1.362(3)   |
| C(3)-H(3)       | 0.9300     |
| C(4)-C(5)       | 1.379(2)   |
| C(4)-H(4)       | 0.9300     |
| C(5)-C(6)       | 1.387(2)   |
| C(5)-H(5)       | 0.9300     |
| C(6)-C(7)       | 1.489(2)   |
| C(7)-C(8)       | 1.512(2)   |
| C(8)-C(9)       | 1.499(3)   |
| C(8)-H(8A)      | 0.9700     |
| C(8)-H(8B)      | 0.9700     |
| C (9)-H(9A)     | 0.9600     |
| C(9)-H(9B)      | 0.9600     |
| C(9)-H(9C)      | 0.9600     |
| C(10)-C(11)     | 1.371(3)   |
| C(10)-C(15)     | 1.381(3)   |
| C(11)-C(12)     | 1.376(3)   |
| C(11)-H(11)     | 0.9300     |
| C(12)-C(13)     | 1.371(3)   |
| C(12)-H(12)     | 0.9300     |
| C(13)-C(14)     | 1.380(3)   |
| C(13)-C(16)     | 1.506(3)   |
| C(14)-C(15)     | 1.369(3)   |
| C(14)-H(14)     | 0.9300     |
| C(15)-H(15)     | 0.9300     |
| C(16)-H(16A)    | 0.9600     |
| C(16)-H(16B)    | 0.9600     |
| C(16)-H(16C)    | 0.9600     |
| O(2)-S(1)-O(1)  | 118.69(10) |
| O(2)-S(1)-N(1)  | 108.73(8)  |
| O(1)-S(1)-N(1)  | 110.99(8)  |
| O(2)-S(1)-C(10) | 108.40(8)  |
| O(1)-S(1)-C(10) | 107.61(8)  |

|                   |            |
|-------------------|------------|
| N(1)-S(1)-C(10)   | 100.90(7)  |
| C(7)-N(1)-S(1)    | 121.82(11) |
| C(2)-C(1)-C(6)    | 120.97(17) |
| C(2)-C(1)-H(1)    | 119.5      |
| C(6)-C(1)-H(1)    | 119.5      |
| C(1)-C(2)-C(3)    | 120.21(17) |
| C(1)-C(2)-H(2)    | 119.9      |
| C(3)-C(2)-H(2)    | 119.9      |
| C(4)-C(3)-C(2)    | 119.60(17) |
| C(4)-C(3)-H(3)    | 120.2      |
| C(2)-C(3)-H(3)    | 120.2      |
| C(3)-C(4)-C(5)    | 120.48(18) |
| C(3)-C(4)-H(4)    | 119.8      |
| C(5)-C(4)-H(4)    | 119.8      |
| C(4)-C(5)-C(6)    | 120.85(18) |
| C(4)-C(5)-H(5)    | 119.6      |
| C(6)-C(5)-H(5)    | 119.6      |
| C(5)-C(6)-C(1)    | 117.87(16) |
| C(5)-C(6)-C(7)    | 121.86(15) |
| C(1)-C(6)-C(7)    | 120.23(15) |
| N(1)-C(7)-C(6)    | 116.10(14) |
| N(1)-C(7)-C(8)    | 125.87(15) |
| C(6)-C(7)-C(8)    | 118.00(14) |
| C(9)-C(8)-C(7)    | 111.40(16) |
| C(9)-C(8)-H(8A)   | 109.3      |
| C(7)-C(8)-H(8A)   | 109.3      |
| C(9)-C(8)-H(8B)   | 109.3      |
| C(7)-C(8)-H(8B)   | 109.3      |
| H(8A)-C(8)-H(8B)  | 108.0      |
| C(8)-C(9)-H(9A)   | 109.5      |
| C(8)-C(9)-H(9B)   | 109.5      |
| H(9A)-C(9)-H(9B)  | 109.5      |
| C(8)-C(9)-H(9C)   | 109.5      |
| H(9A)-C(9)-H(9C)  | 109.5      |
| H(9B)-C(9)-H(9C)  | 109.5      |
| C(11)-C(10)-C(15) | 119.80(17) |
| C(11)-C(10)-S(1)  | 120.49(14) |
| C(15)-C(10)-S(1)  | 119.71(14) |
| C(10)-C(11)-C(12) | 119.48(18) |
| C(10)-C(11)-H(11) | 120.3      |
| C(12)-C(11)-H(11) | 120.3      |
| C(13)-C(12)-C(11) | 121.92(18) |
| C(13)-C(12)-H(12) | 119.0      |
| C(11)-C(12)-H(12) | 119.0      |
| C(12)-C(13)-C(14) | 117.51(18) |
| C(12)-C(13)-C(16) | 122.3(2)   |

|                      |            |
|----------------------|------------|
| C(14)-C (13)-C(16)   | 120.17(19) |
| C(15)-C(14)-C(13)    | 121.73(18) |
| C(15)-C(14)-H(14)    | 119.1      |
| C(13)-C(14)-H(14)    | 119.1      |
| C(14)-C(15)-C(10)    | 119.56(18) |
| C(14)-C(15)-H(15)    | 120.2      |
| C(10)-C(15)-H(15)    | 120.2      |
| C(13)-C(16) -H (16A) | 109.5      |
| C(13)-C(16)-H(16B)   | 109.5      |
| H(16A)-C(16)-H(16B)  | 109.5 .    |
| C(13)-C(16)-H(16C)   | 109.5      |
| H(16A)-C(16)-H(16C)  | 109.5      |
| H(16B)-C(16)-H(16C)  | 109.5      |
